# Supplementary material
Source: PubMed Central journal article supplement (PMC1570421)
Supplement: pnas_0603485103_1.pdf [file pnas_0603485103_1.pdf]

**Table 4. Putative protein-binding site alterations due to the *ERCC6* C-6530>G**

| Allele C                                   |                                    | Allele G                                   |                                    |
|--------------------------------------------|------------------------------------|--------------------------------------------|------------------------------------|
| Putative transcription factor binding site | Corresponding transcription factor | Putative transcription factor binding site | Corresponding transcription factor |
| -6530                                      |                                    | -6530                                      |                                    |
| GACAGCTCT <b>C</b> CATCCTTCCC              |                                    | GACAGCTCT <b>G</b> CATCCTTCCC              |                                    |
| <u>*****</u>                               | Sp1                                | <u>*****</u>                               | Oct-1                              |
|                                            |                                    | <u>*****</u>                               | Sp1                                |
|                                            |                                    | <u>*****</u>                               | GATA-1                             |

The wild-type/SNP and adjacent sequence context were analyzed for putative transcription factor binding sites by running the ALIBABA2 search engine to interrogate the TRANSFAC database. The polymorphic site is shown in bold, and its location is indicated by number. Asterisks indicate the recognition element of the corresponding transcription factor.
