# Supplementary material
Source: PubMed Central journal article supplement (PMC1570421)
Supplement: pnas_0603485103_2.pdf [file pnas_0603485103_2.pdf]

**Table 5. Study group information on included Caucasian of non-Hispanic descent subjects**

| Categories                     | N   | Age<br>mean±SD<br>(range) | Male (%)   | Comments                                                                                             |
|--------------------------------|-----|---------------------------|------------|------------------------------------------------------------------------------------------------------|
| Controls                       | 269 | 69.2±6.4<br>(60-87)       | 123 (46.7) | Controls were defined by an absence of drusen or <5 small drusen (<63µm) in the center of the macula |
| Clinically diagnosed AMD cases | 460 | 71.7±7.4<br>(55-98)       | 195 (42.4) | Only advanced AMD cases were included.                                                               |
| Archived non-AMD               | 18  | 72.8±7.8                  | 8 (44.4)   | Archived ocular slides from normal eye                                                               |
| Archived AMD                   | 57  | 82.8±9.1                  | 27 (47.4)  | Ocular sections from pathologically diagnosed advanced AMD cases                                     |
